# Supplementary material for: Using Population Genetic Theory and DNA Sequences for Species Detection and Identification in Asexual Organisms
Source: PubMed Central journal article supplement (PMC2869354; doi:10.1371/journal.pone.0010609), 2010-05-13
Supplement: pone.0010609.s003.pdf [file pone.0010609.s003.pdf]

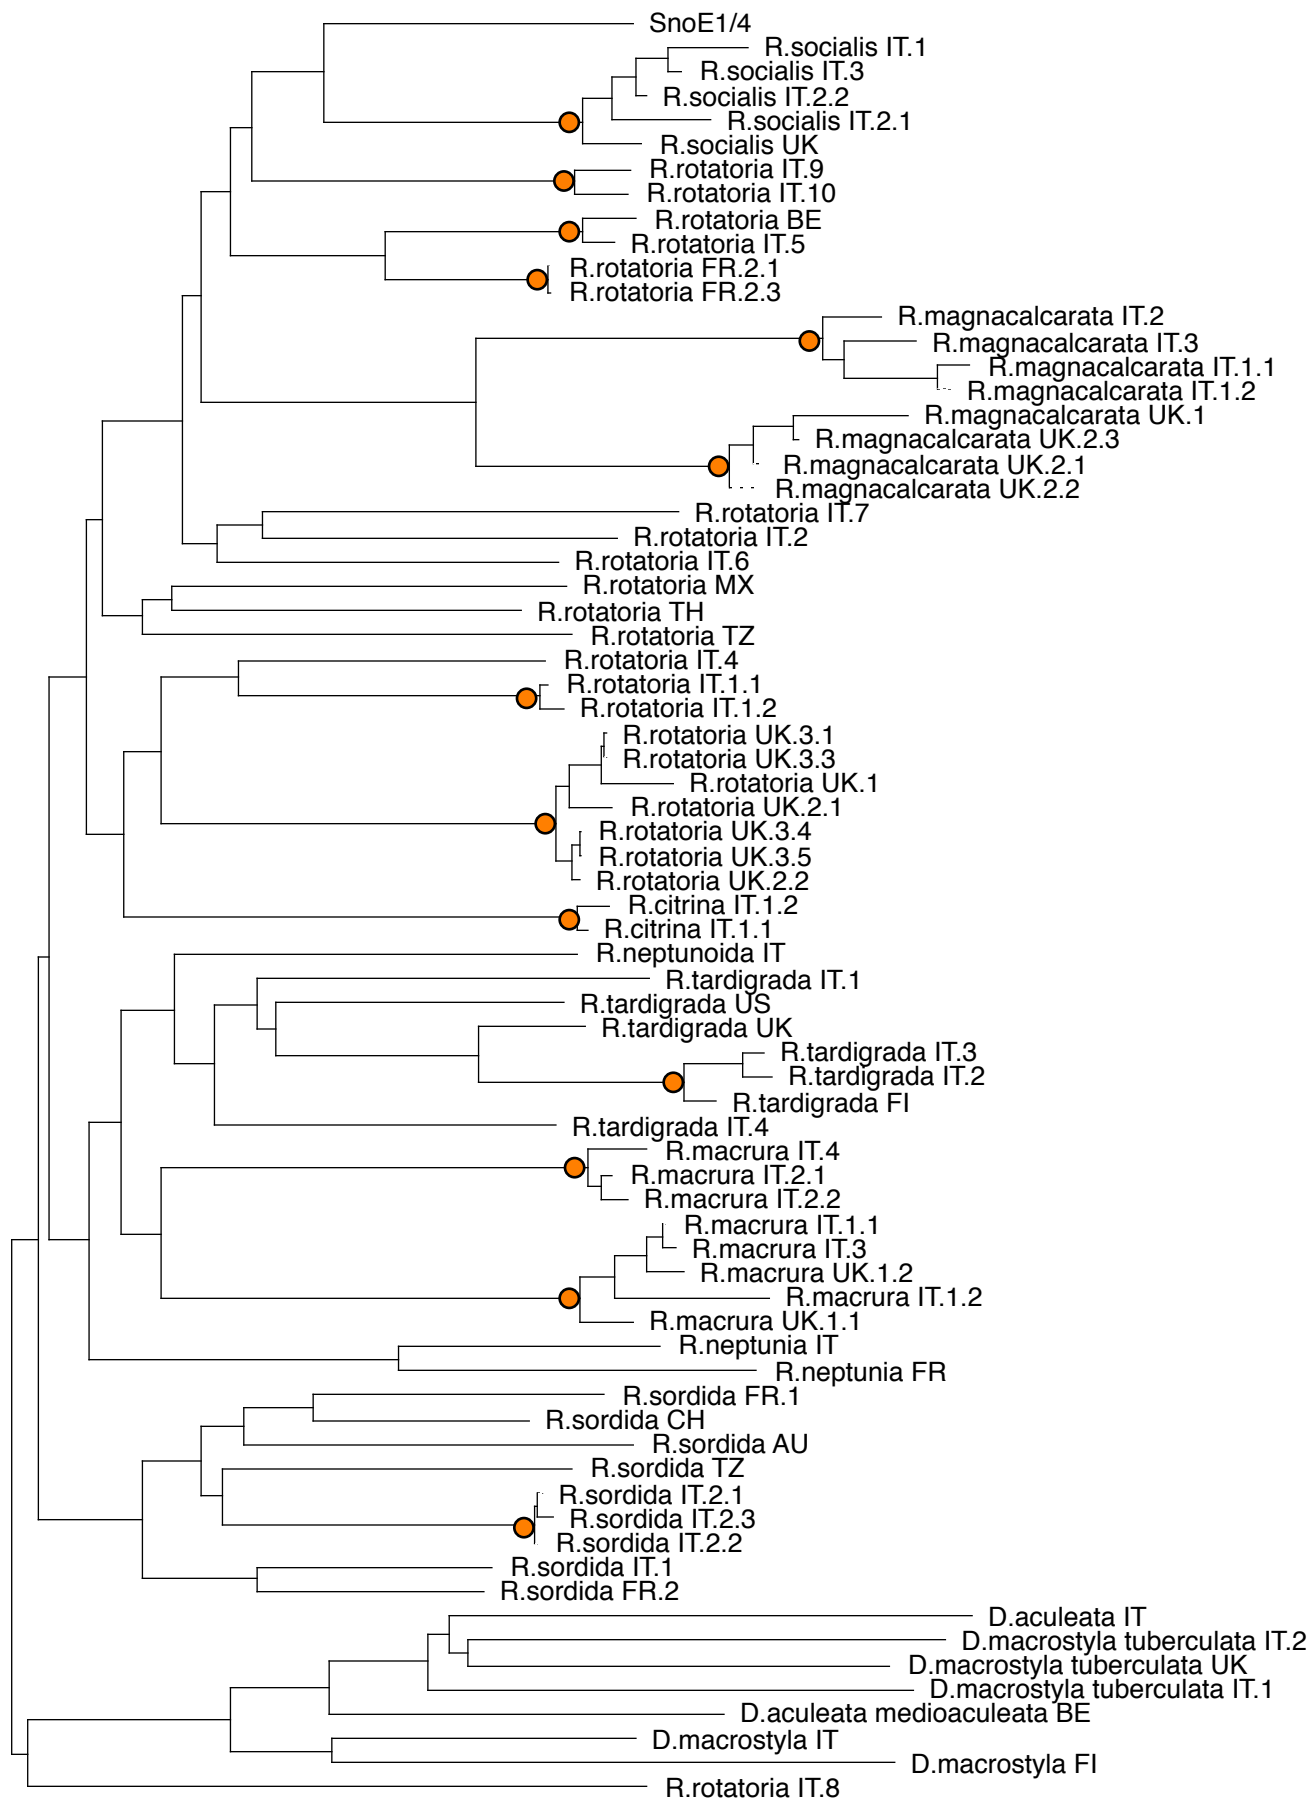

— 0.01 substitutions/site
