# Supplementary material for: Using Population Genetic Theory and DNA Sequences for Species Detection and Identification in Asexual Organisms
Source: PubMed Central journal article supplement (PMC2869354; doi:10.1371/journal.pone.0010609), 2010-05-13

>PSP337 05 101698 Aspergillus niger  
>PSP335 05 55465 Aspergillus niger  
>PSP336 05 12049 Aspergillus niger

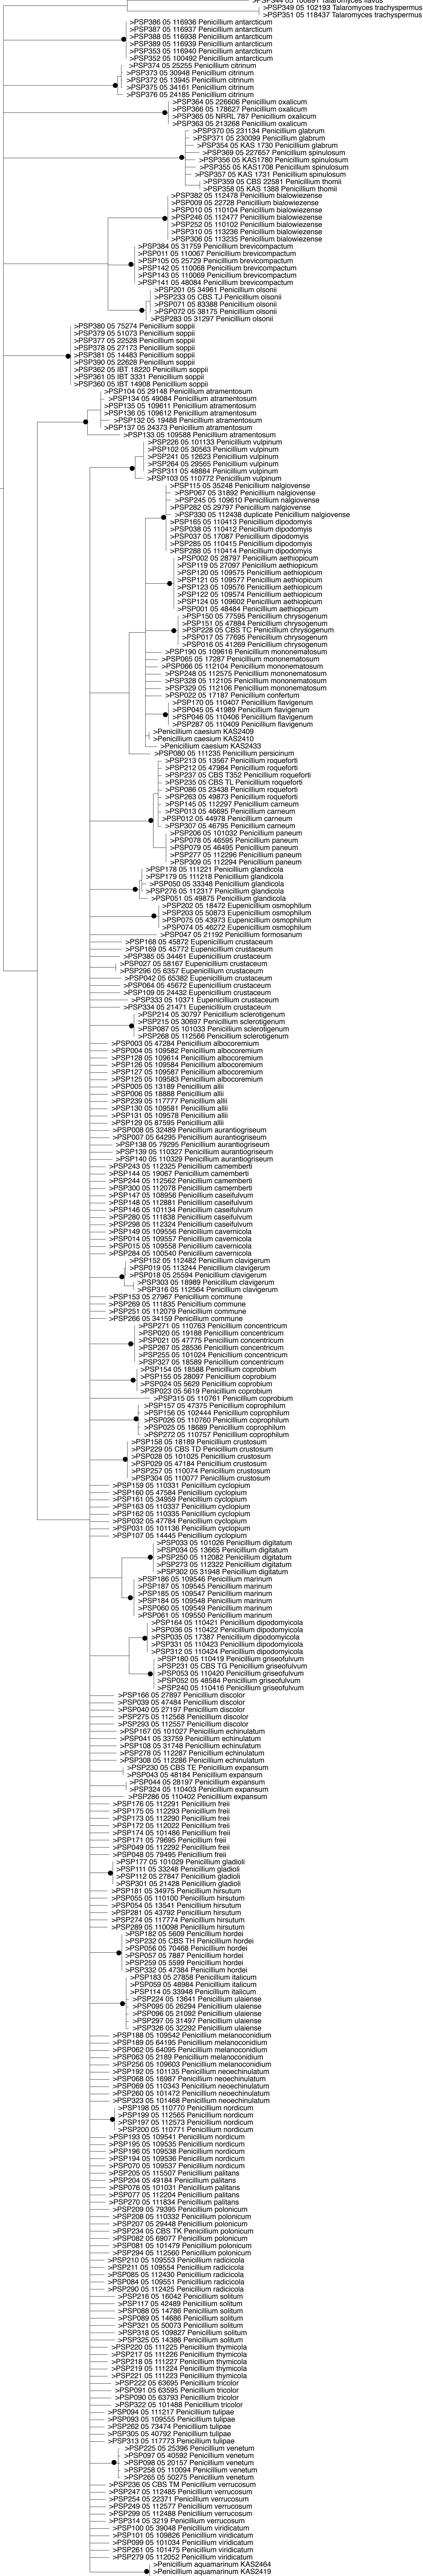

Supplement: pone.0010609.s004.pdf [file pone.0010609.s004.pdf]
